# Supplementary material for: The Cloud Feedback Model Intercomparison Project (CFMIP) contribution to CMIP6
Source: Copernicus journal article supplement (doi:10.5194/gmd-10-359-2017), 2017-01-25
Supplement: Supplementary file [file gmd-10-359-2017-supplement-title-page.pdf › gmd-10-359-2017-supplement-title-page.pdf]

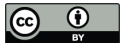

## *Supplement of*

# **The Cloud Feedback Model Intercomparison Project (CFMIP) contribution to CMIP6**

**Mark J. Webb et al.**

*Correspondence to:* Mark J. Webb (mark.webb@metoffice.gov.uk)

- gmd-10-359-2017-supplement-title-page.pdf
- gmd-2016-70-supplement-version1
  - gmd-supplement
    - \* cfmip2\_4k\_patterned\_sst\_forcing.vn1.0.nc
    - \* cmip6-cfsites-locations.txt

The copyright of individual parts of the supplement might differ from the CC-BY 3.0 licence.
